# Supplementary material
Source: PubMed Central journal article supplement (PMC8414379)
Supplement: ajcr0011-3935-f6.pdf [file ajcr0011-3935-f6.pdf]

# Tumor treating fields sensitize trastuzumab resistant breast cancer

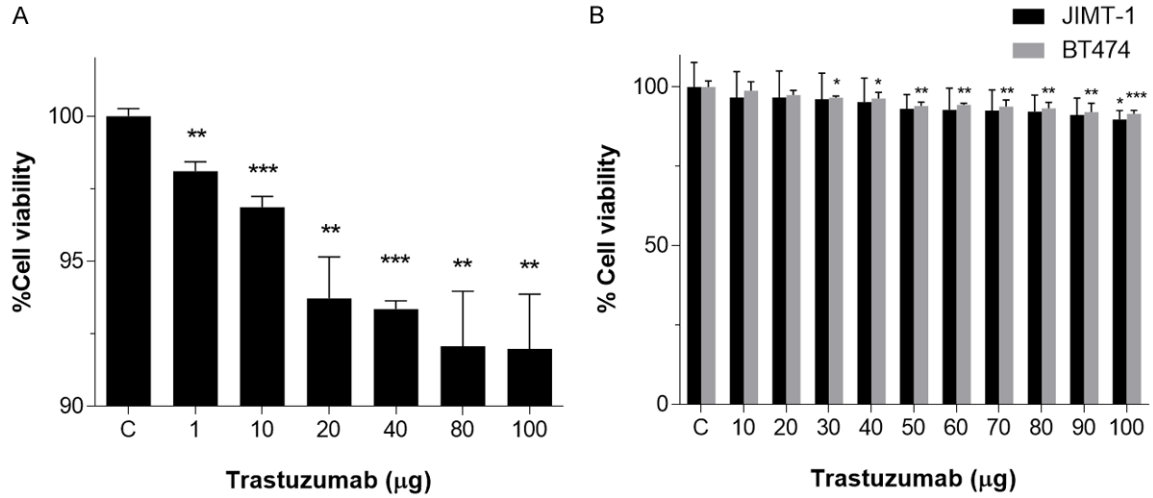

**Supplementary Figure 1.** The effect of trastuzumab-treatment on the viability of HER2-positive cell. A. TRZ inhibited HER2-positive cell viability in a dose-dependent manner. B. Cell viability was evaluated using MTT assay for Jimt1 and BT474 cells treated with the specified amounts of TRZ; \* $p < 0.05$ , \*\* $p < 0.01$ , \*\*\* $p < 0.001$ .
